# Supplementary material for: The iron–thiol–oxygen nexus for iron flux from bare and ferritin-caged minerals and safeguarding DNA: the impact of the thiol structure and protein coat
Source: Royal Society of Chemistry journal article supplement (doi:10.1039/d5tb02365c), 2025-12-10
Supplement: d5tb02365c1.pdf [file d5tb02365c1.pdf]

Electronic Supporting Information

**The Iron-Thiol-Oxygen Nexus for Iron Flux from Bare and Ferritin-caged Mineral  
and Safeguarding DNA: Impact of Thiol Structure and Protein Coat**

Tanaya Subudhi, Narmada Behera, Rabindra K. Behera\*

*Department of chemistry, National Institute of Technology, Rourkela-769008, Odisha, India.*

\*To whom correspondence should be addressed: Rabindra K. Behera, Tel: +91-661-2462980;  
Fax: +91-661-2462651; E-mail: [beherarabi@nitrkl.ac.in](mailto:beherarabi@nitrkl.ac.in)

**A.**

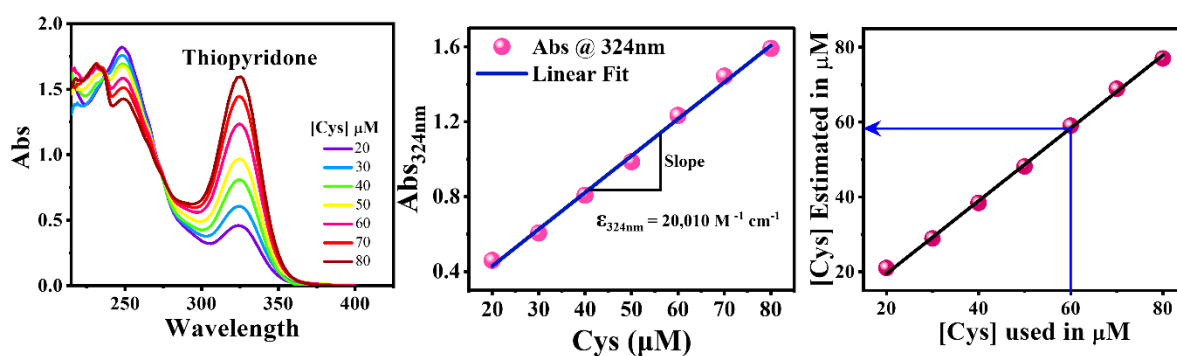

**B.**

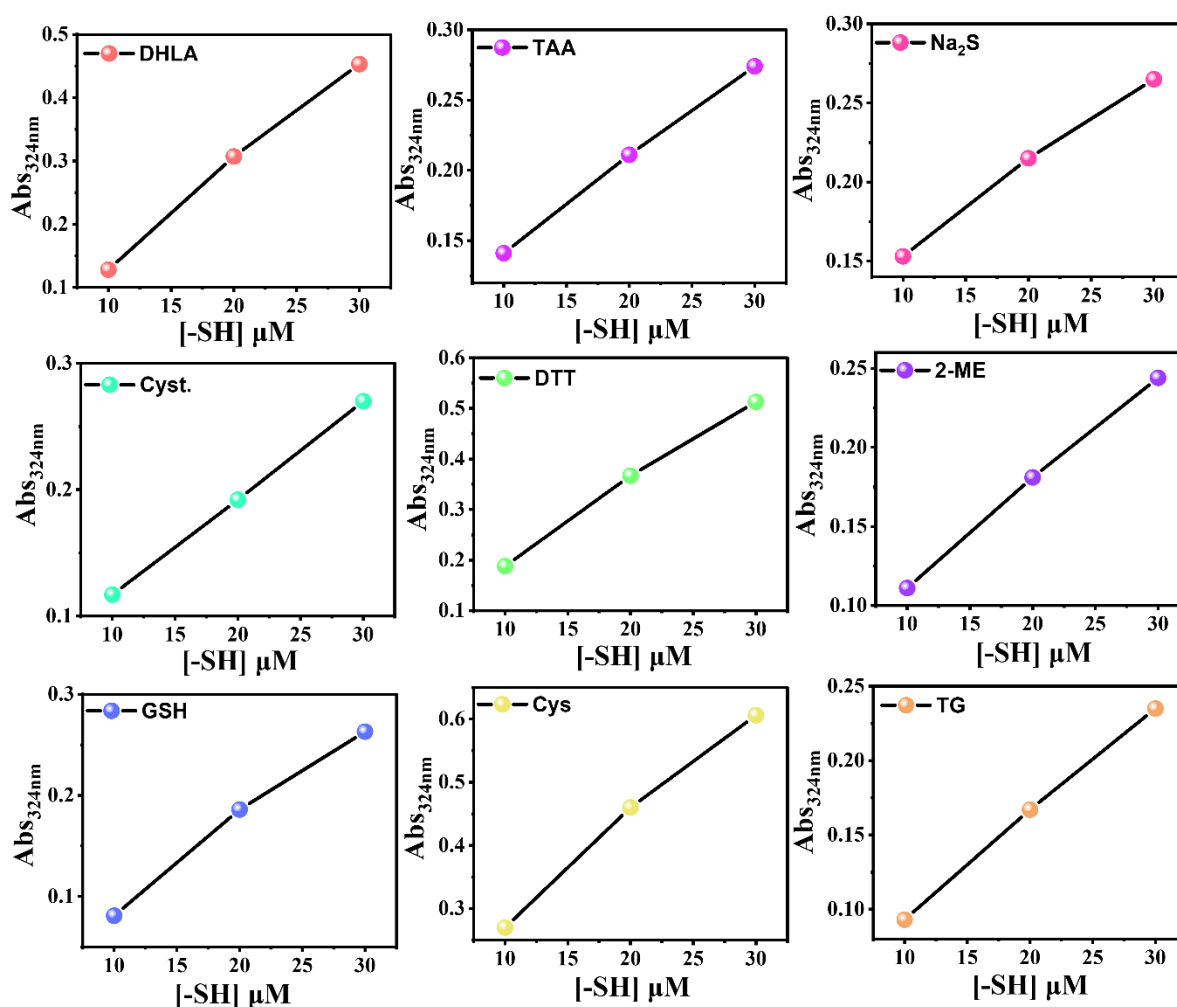

**Figure S1: Thiol estimation by 4-DPS assay. (A)** Standard curve for cysteine (as representative thiol) based on 4-DPS assay. The concentrations of reduced form of thiols ( $-\text{SH}$ ) were quantified from the slope, i.e., molar absorptivity value ( $\epsilon_{324\text{nm}} = 20,010 \text{ M}^{-1} \text{ cm}^{-1}$ ). The

estimated concentration of -SH was correlated with the amount of thiols used. **(B)**  
 Quantification of reduced forms of all sulfur based reducing agents using 4-DPS assay.<sup>1,2</sup>

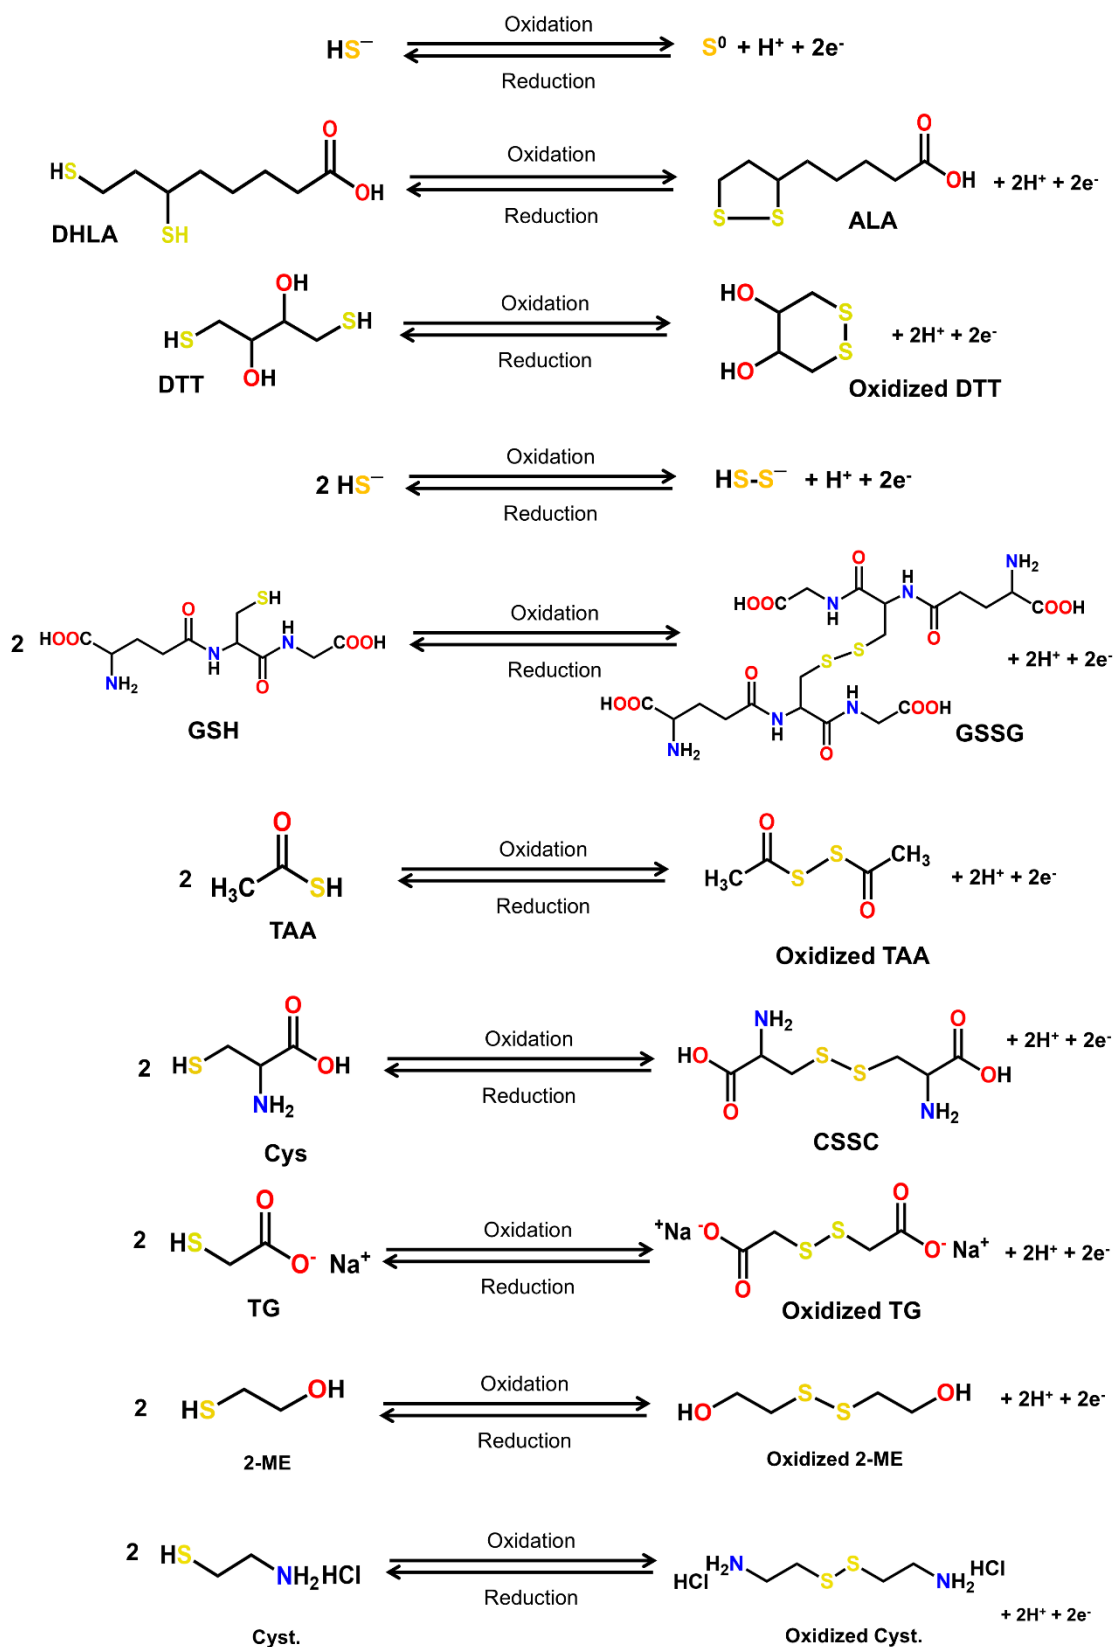

**Figure S2:** Balanced thiol-disulphide redox equation of all sulfur based reducing agents (used for calculation of apparent redox potential).

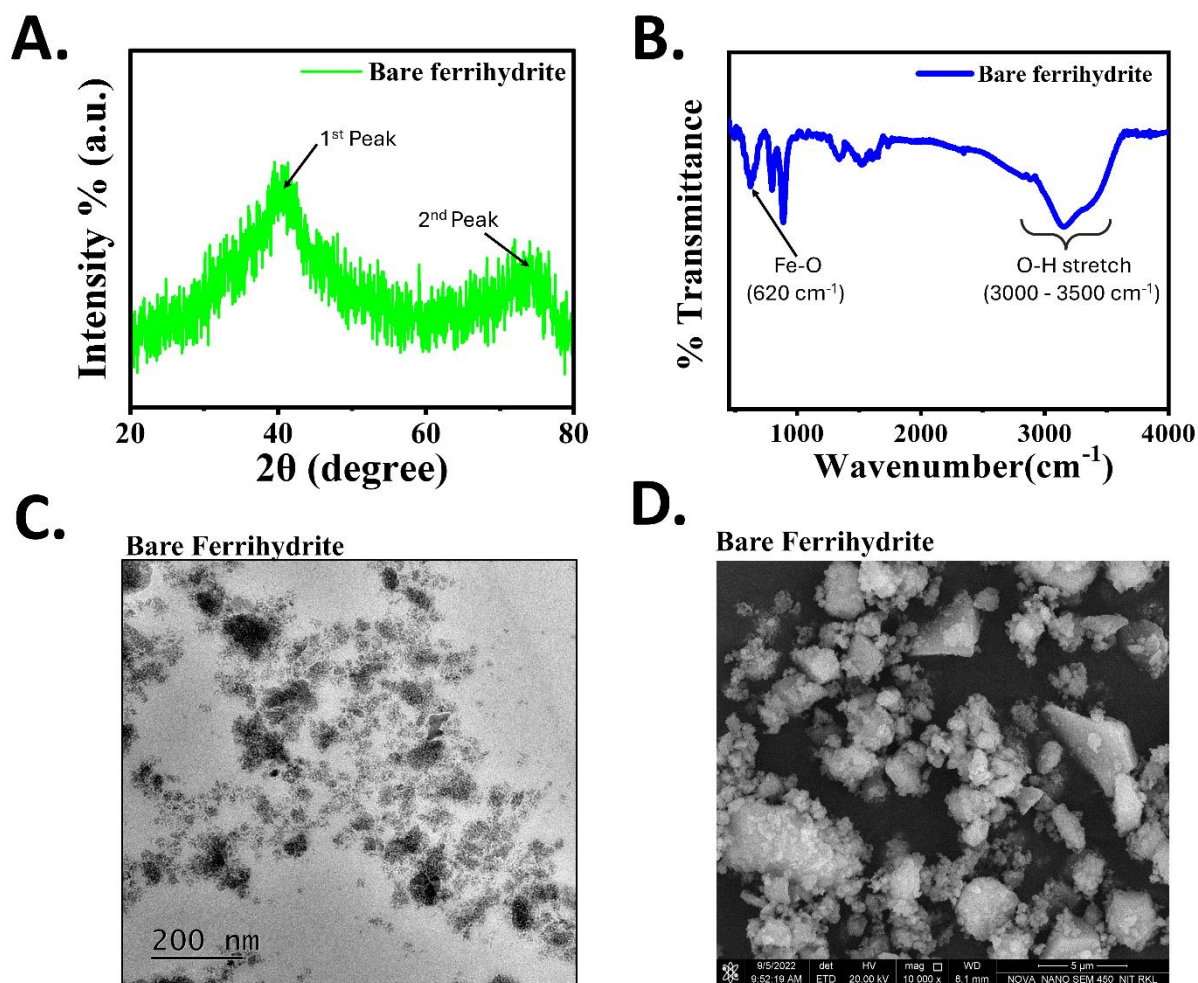

**Figure S3: Characterization of synthesized bare ferrihydrite.** Powder-XRD pattern (A), FT-IR pattern (B), TEM (C) and FESEM (D) of synthesized two-line bare ferrihydrite displaying their characteristic peaks and cluster like distribution.

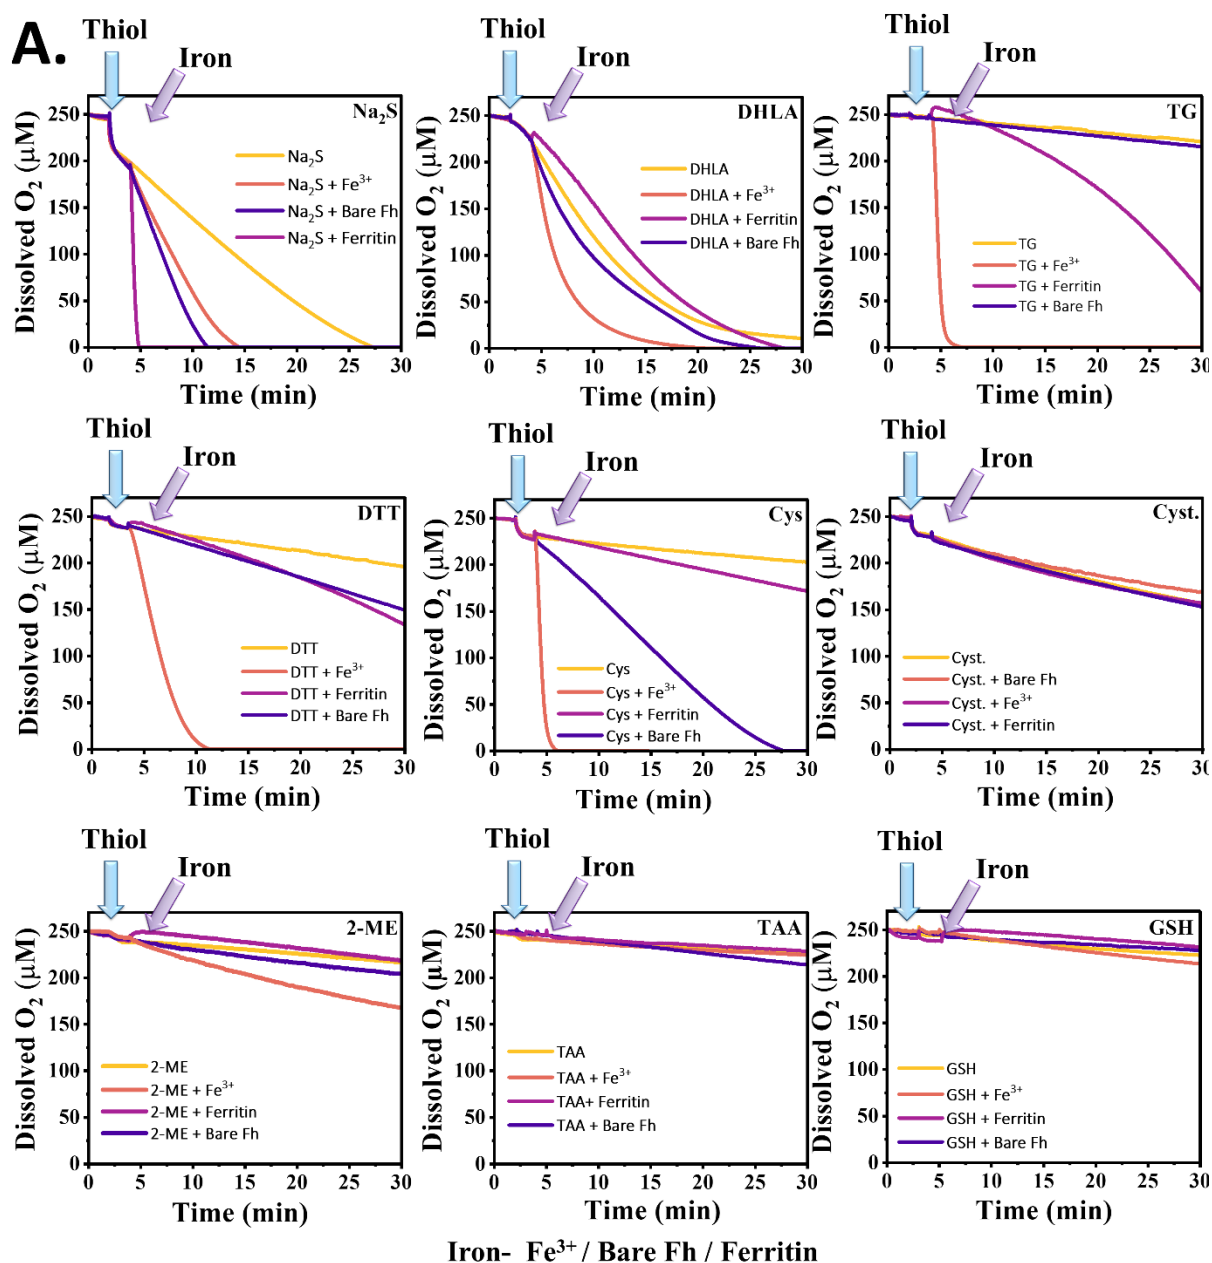

**Figure S4: Impact of iron (Fe<sup>3+</sup>, bare Fh, encapsulate Fh) on dissolved O<sub>2</sub> consumption by thiols.** (A) The kinetic experiments were performed in 100mM MOPS.NaCl buffer pH = 7.0 with 2.5mM thiol and 100μM iron (Fe<sup>2+</sup>/ Fe<sup>3+</sup>/ bare/encapsulated iron mineral). The arrow indicates the time point of injection of the respective reactants.

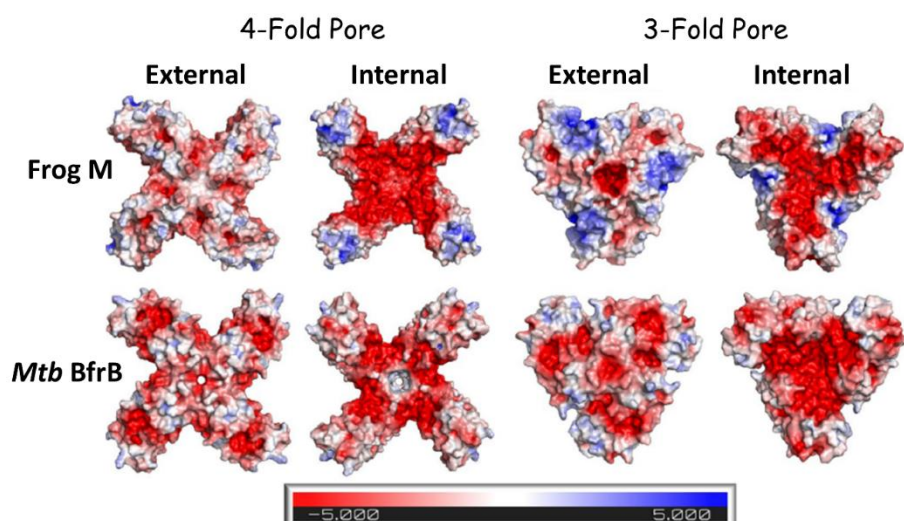

**Figure S5: Structure and variable pore electrostatics of frog M and *Mtb* BfrB ferritins.** Ferritin electrostatic potential surfaces along the three-fold and four-fold pores of: frog M ferritin (PDB: 1MFR), and Mtb BfrB (PDB: 3QD8). Ferritin structures are generated using PyMOL-ABPS. Figures adapted from <sup>3</sup>

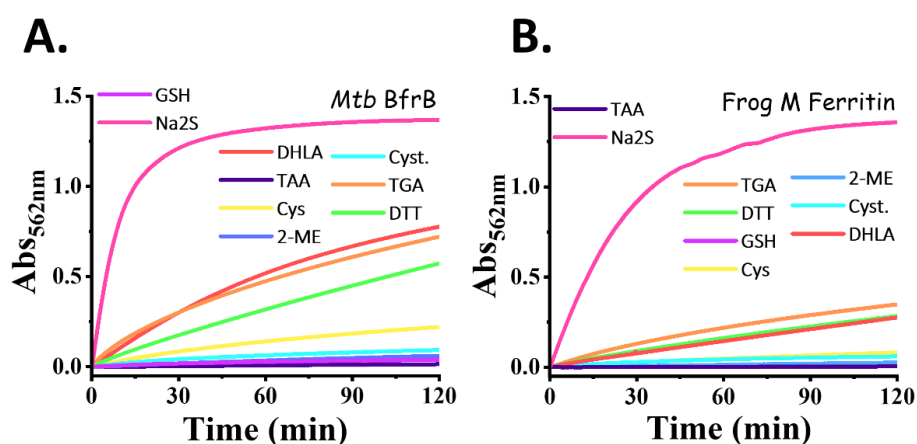

**Figure S6: Impact of anaerobic condition on reductive iron release.** The reductive iron mobilization was carried out in anaerobic conditions for both Mtb BfrB (A) and Frog M (B) ferritin. All the samples were deoxygenated by nitrogen purging prior to the iron dissolution kinetics. The reaction was initiated by mixing 0.2 $\mu$ M ferritin (100  $\mu$ M of caged mineral  $\sim$ 500Fe/Cage) with 1mM of thiols and 1mM of ferrozine, in 100mM MOPS-NaCl buffer (pH-7.0). The trend of iron release was found to be identical with the iron release under aerobic conditions, whereas the amount of released iron was found to be more.

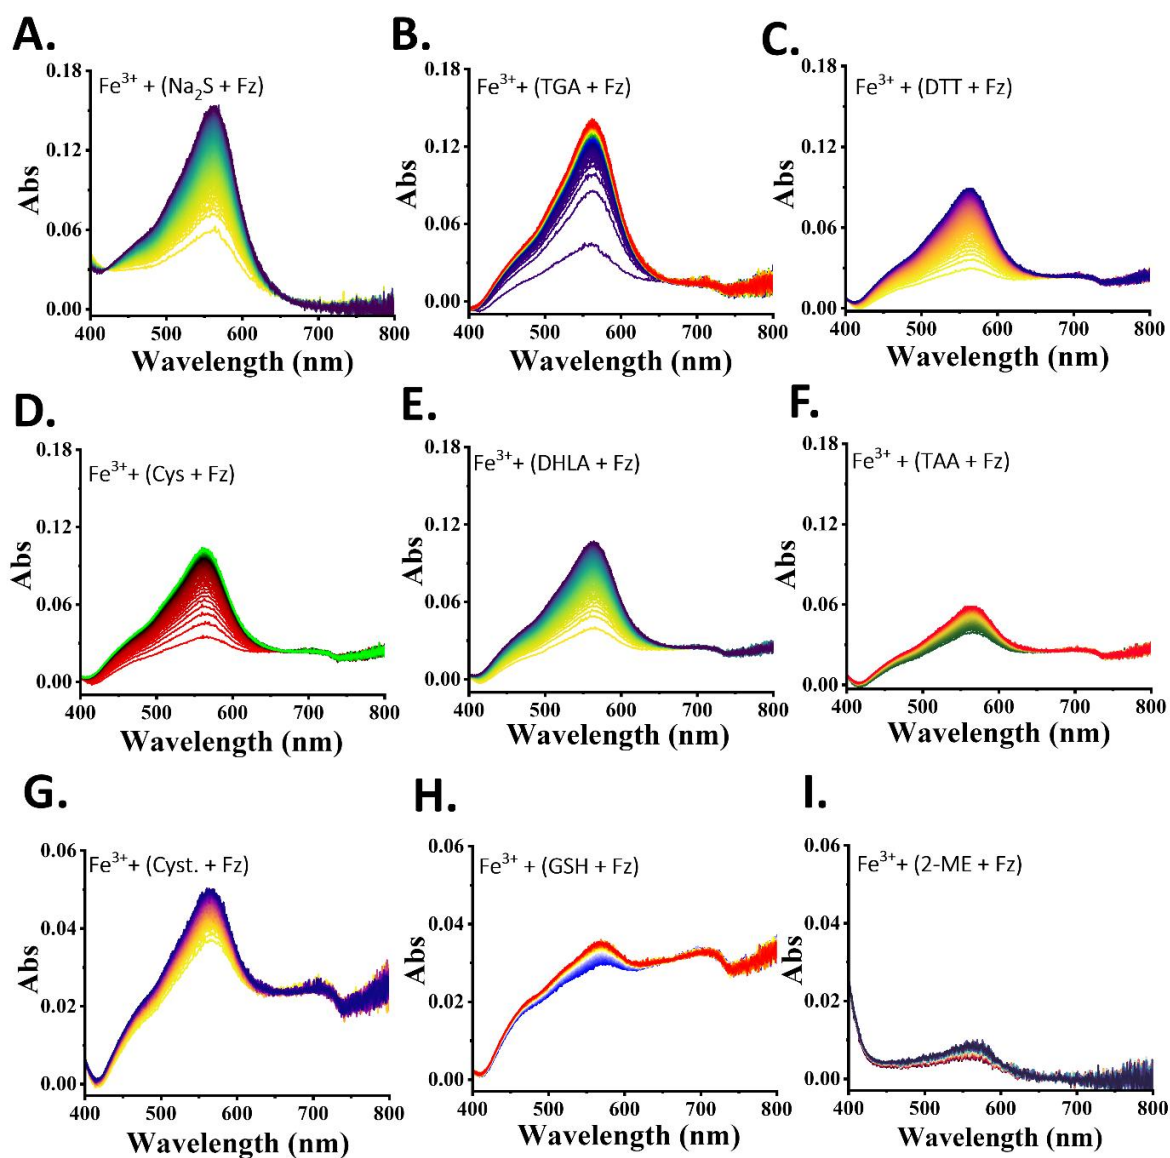

**Figure S7: Stopped-flow rapid kinetics of  $\text{Fe}^{3+}$  reduction by thiols:** The reduction kinetics was performed by mixing equal volumes (1:1) of freshly prepared  $\text{Fe}^{3+}$  solution (100  $\mu\text{M}$  in 1mM HCl) with mixture of thiol (2.5mM) and ferrozine (Fz, 1mM) in 10mM MOPS-NaCl pH-7.0 buffer in a stopped-flow rapid mixing unit.



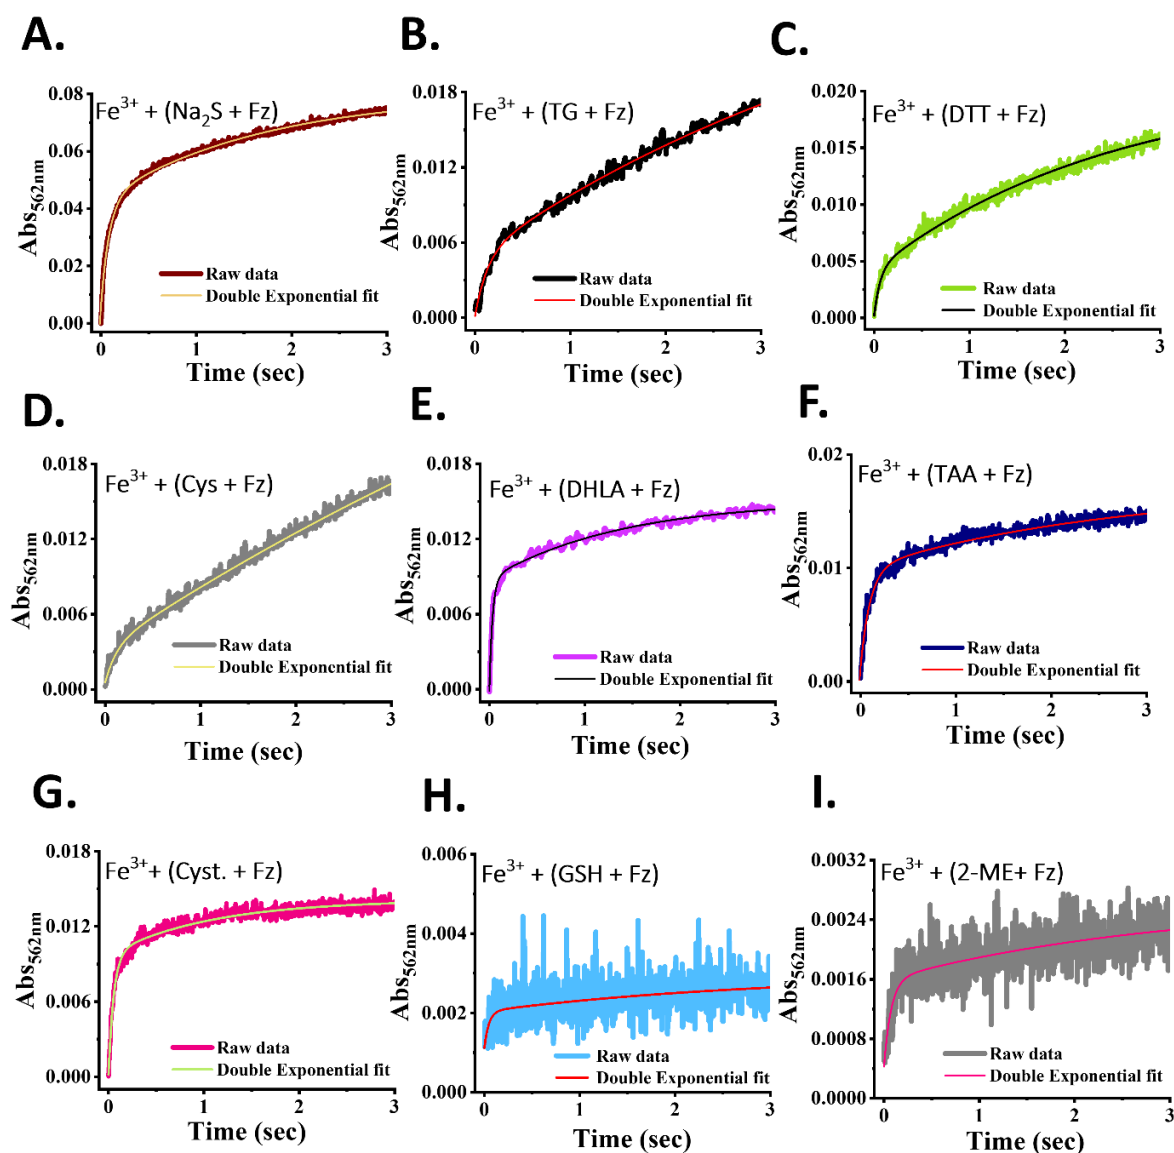

**Figure S8: Stopped-flow rapid kinetics of  $\text{Fe}^{3+}$  reduction by thiols:** The reduction kinetics was performed by mixing equal volumes (1:1) of freshly prepared  $\text{Fe}^{3+}$  solution (100  $\mu\text{M}$  in 1mM HCl) with mixture of thiol (2.5mM) and ferrozine (Fz, 1mM) in 10mM MOPS-NaCl pH-7.0 buffer in a stopped-flow rapid mixing unit. Time courses for  $\text{Fe}^{3+}$  reduction at 562nm with nonlinear fitting with double exponential equation. The observed rate constants are listed in **Table 2**.



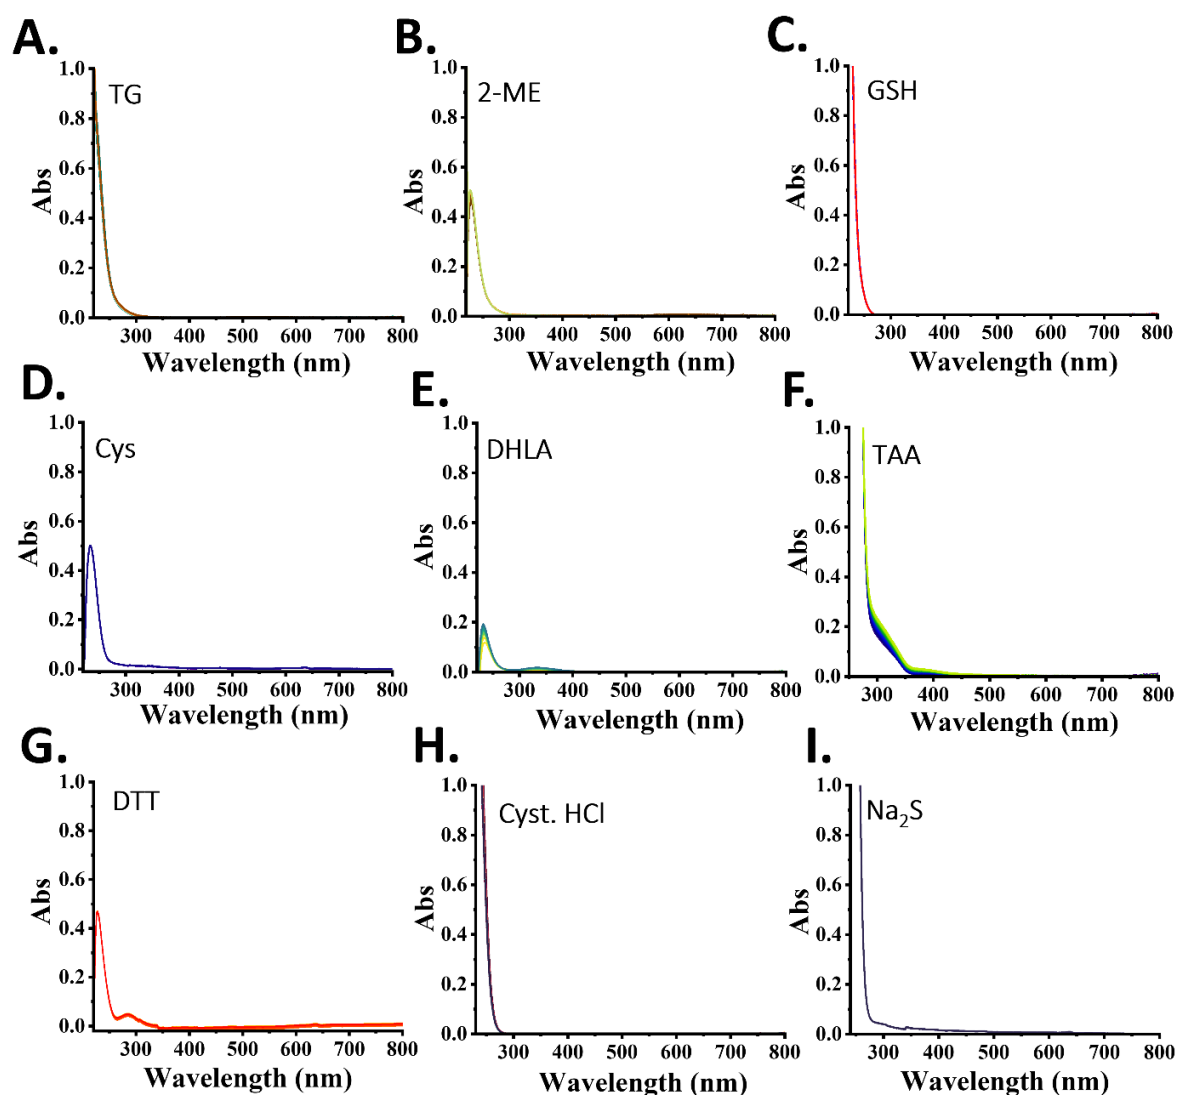

**Figure S9:** Thiol stability (Spectral kinetics of thiols- 2.5mM) in 100mM MOPS-NaCl, pH-7.0 buffer, control reactions.

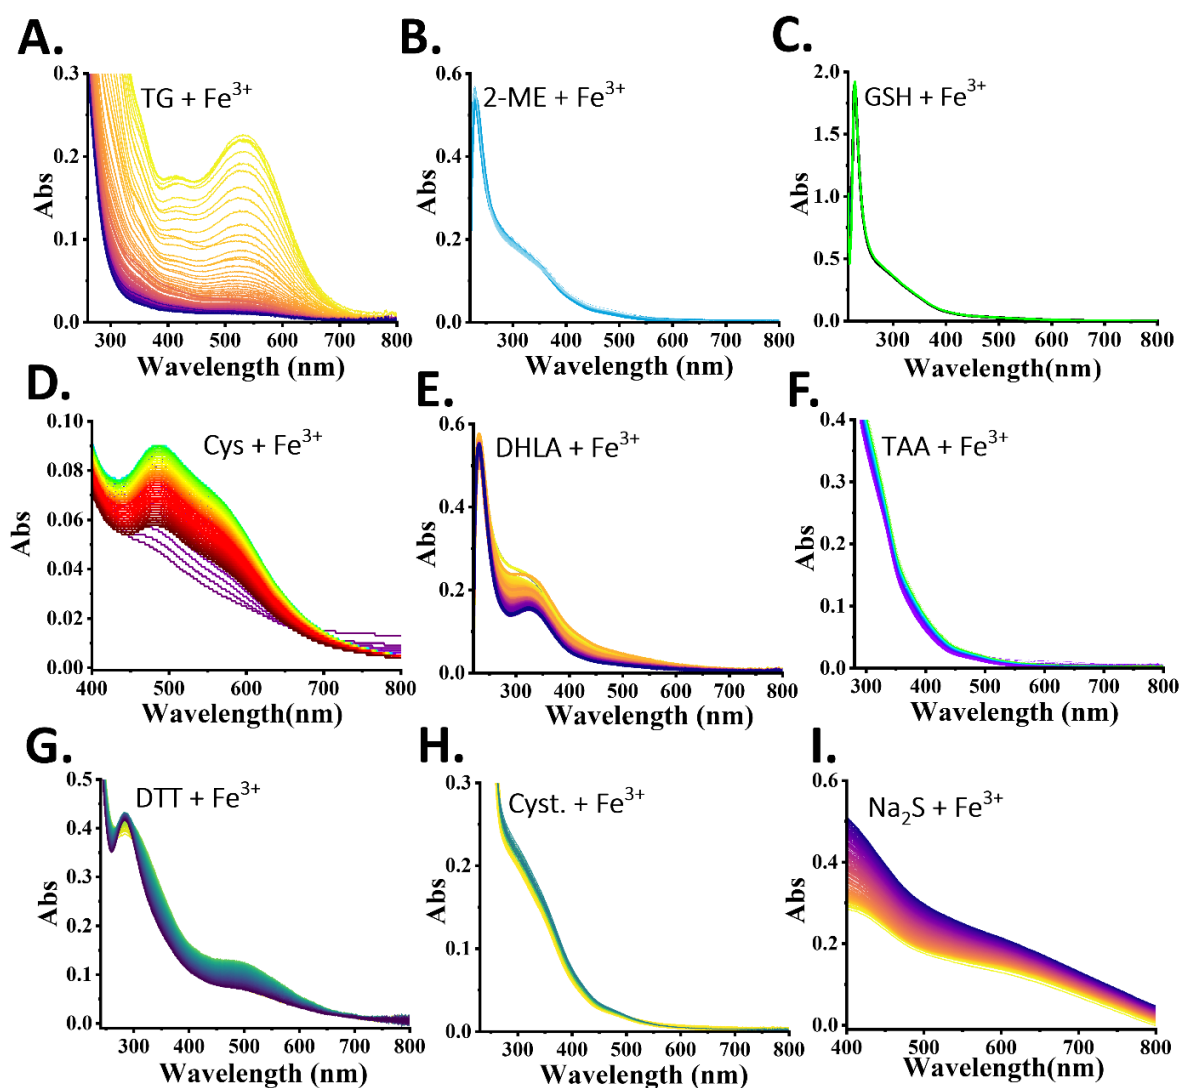

**Figure S10:  $\text{Fe}^{3+}$ -thiol interaction: Kinetic analysis by manual mixing.** The interaction kinetics was performed by mixing freshly prepared  $\text{Fe}^{3+}$  ( $100\mu\text{M}$  in  $1\text{mM}$   $\text{HCl}$ ) with respective thiols ( $2.5\text{mM}$ ) in  $100\text{ mM}$   $\text{MOPS-NaCl}$ ,  $\text{pH-7.0}$  buffer. **(A-I)** The spectral kinetics data for  $\text{Fe}^{3+}$  interaction with respective thiols, reveals the formation of transient species for some specific thiols.

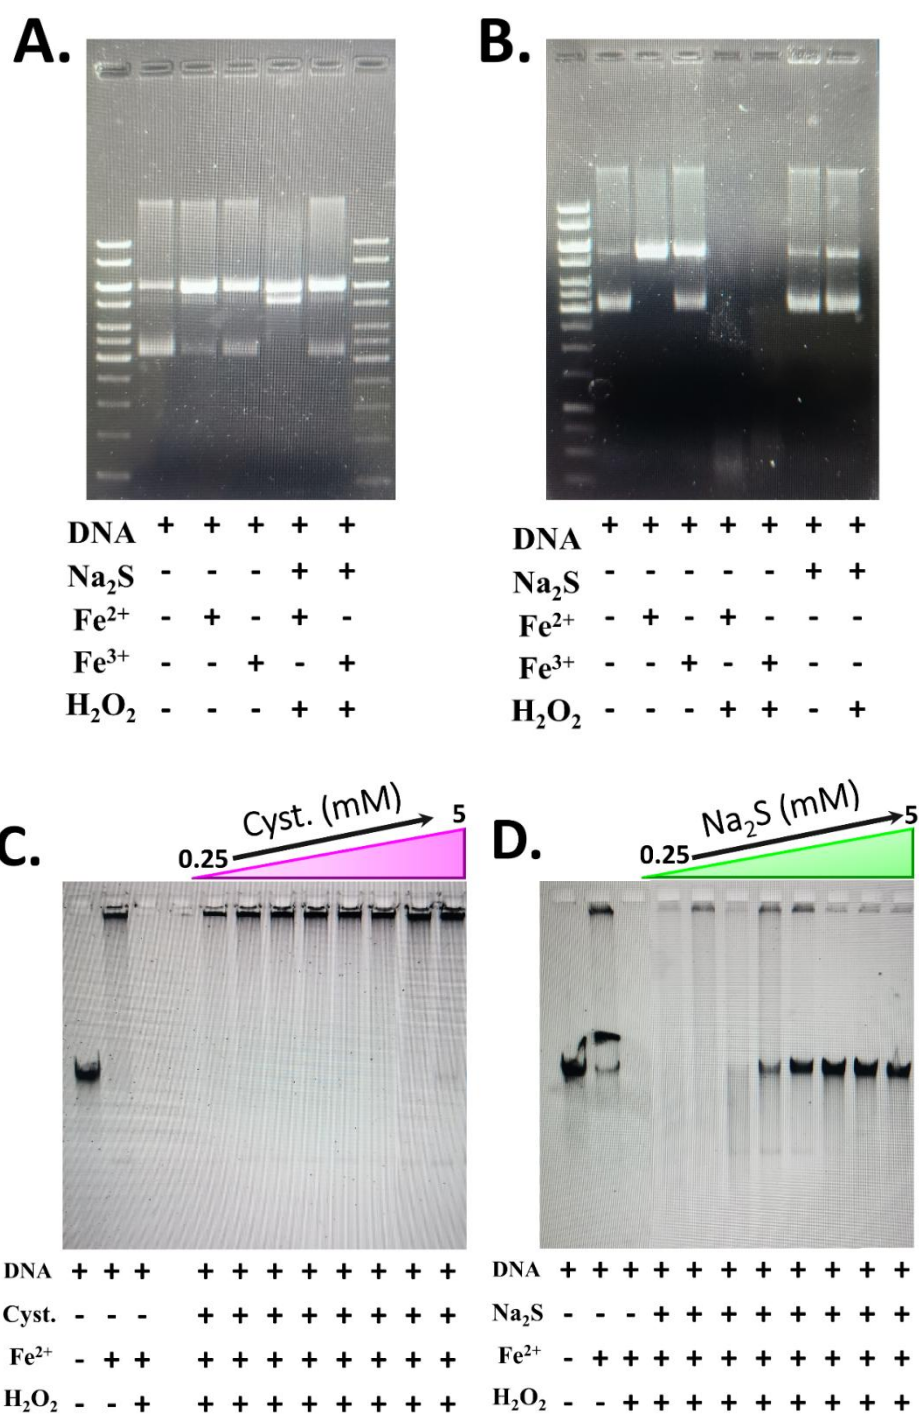

**Figure S11: Agarose gel of control experiments and PC<sub>50</sub> determination.** The “+/-” signs indicate the “with/without” addition of respective constituents. Control reactions of DNA cleavage activity (A-B). Agarose gel depicting concentration variation of Cyst. and Na<sub>2</sub>S respectively for PC<sub>50</sub> determination (C-D).

## References

1. R. E. Hansen, H. Østergaard, P. Nørgaard and J. R. Winther, *Analytical Biochemistry*, 2007, **363**, 77-82.
2. J. R. Winther and C. Thorpe, *Biochimica et biophysica acta*, 2014, **1840**, 838-846.
3. P. K. Koochana, A. Mohanty, A. Parida, N. Behera, P. M. Behera, A. Dixit and R. K. Behera, *JBIC Journal of Biological Inorganic Chemistry*, 2021, **26**, 265-281.
